# Supplementary material
Source: PubMed Central journal article supplement (PMC7363540)
Supplement: NIHMS1576735-supplement-Supp_TableS1.pdf [file NIHMS1576735-supplement-Supp_TableS1.pdf]

**Supplementary Table S1. Baseline characteristics of study population (n = 541).** Values are means  $\pm$  standard deviation unless otherwise noted.

|                                                        | Normal<br>(n = 444) | MCI (n = 58)   | MCR (n = 22)   | MCR and MCI<br>(n = 17) |
|--------------------------------------------------------|---------------------|----------------|----------------|-------------------------|
| Age, years <sup>a</sup>                                | 76.2 $\pm$ 6.3      | 79.0 $\pm$ 6.7 | 76.4 $\pm$ 7.3 | 78.5 $\pm$ 6.9          |
| Sex, % (n) female                                      | 55.9 (248)          | 51.7 (30)      | 40.9 (9)       | 58.8 (10)               |
| Education, years <sup>a</sup>                          | 14.9 $\pm$ 2.9      | 13.4 $\pm$ 3.0 | 13.9 $\pm$ 2.2 | 12.5 $\pm$ 4.2          |
| Summary multi-morbidity score (0-10)                   | 1.6 $\pm$ 1.1       | 1.7 $\pm$ 1.0  | 1.9 $\pm$ 1.3  | 1.8 $\pm$ 1.3           |
| <b>Big Five Inventory Scores by Personality Traits</b> |                     |                |                |                         |
| Extraversion <sup>a</sup>                              | 27.8 $\pm$ 6.3      | 28.4 $\pm$ 5.4 | 26.6 $\pm$ 5.9 | 22.9 $\pm$ 6.7          |
| Agreeableness                                          | 38.7 $\pm$ 4.6      | 38.4 $\pm$ 4.7 | 37.0 $\pm$ 5.9 | 38.7 $\pm$ 4.7          |
| Conscientiousness                                      | 37.8 $\pm$ 5.4      | 37.7 $\pm$ 5.5 | 36.3 $\pm$ 6.1 | 35.3 $\pm$ 6.7          |
| Neuroticism                                            | 18.0 $\pm$ 6.1      | 18.7 $\pm$ 6.7 | 20.1 $\pm$ 7.9 | 19.9 $\pm$ 7.0          |
| Openness <sup>a</sup>                                  | 38.3 $\pm$ 6.6      | 36.5 $\pm$ 7.2 | 35.7 $\pm$ 7.6 | 34.8 $\pm$ 7.9          |

<sup>a</sup> Indicates significant differences ( $p < 0.05$ ) between groups.
